# Supplementary material
Source: PubMed Central journal article supplement (PMC3268533)

## SUPPLEMENTARY DATA

FIG. S1. Light response curves for *Ruellia nudiflora* individuals acclimated to 50 % and 90 % of total ambient photosynthetic photon flux density (PPFD). Data are means  $\pm$  s.e. ( $n = 10$ ). Light curves were built using an infrared gas analyser (LI-6400, LI-COR, Lincoln, NE, USA) equipped with a red/blue light source (6400-02B, LI-COR). CO<sub>2</sub> concentration in the cuvette was held at 380  $\mu\text{mol m}^{-2} \text{s}^{-1}$ .

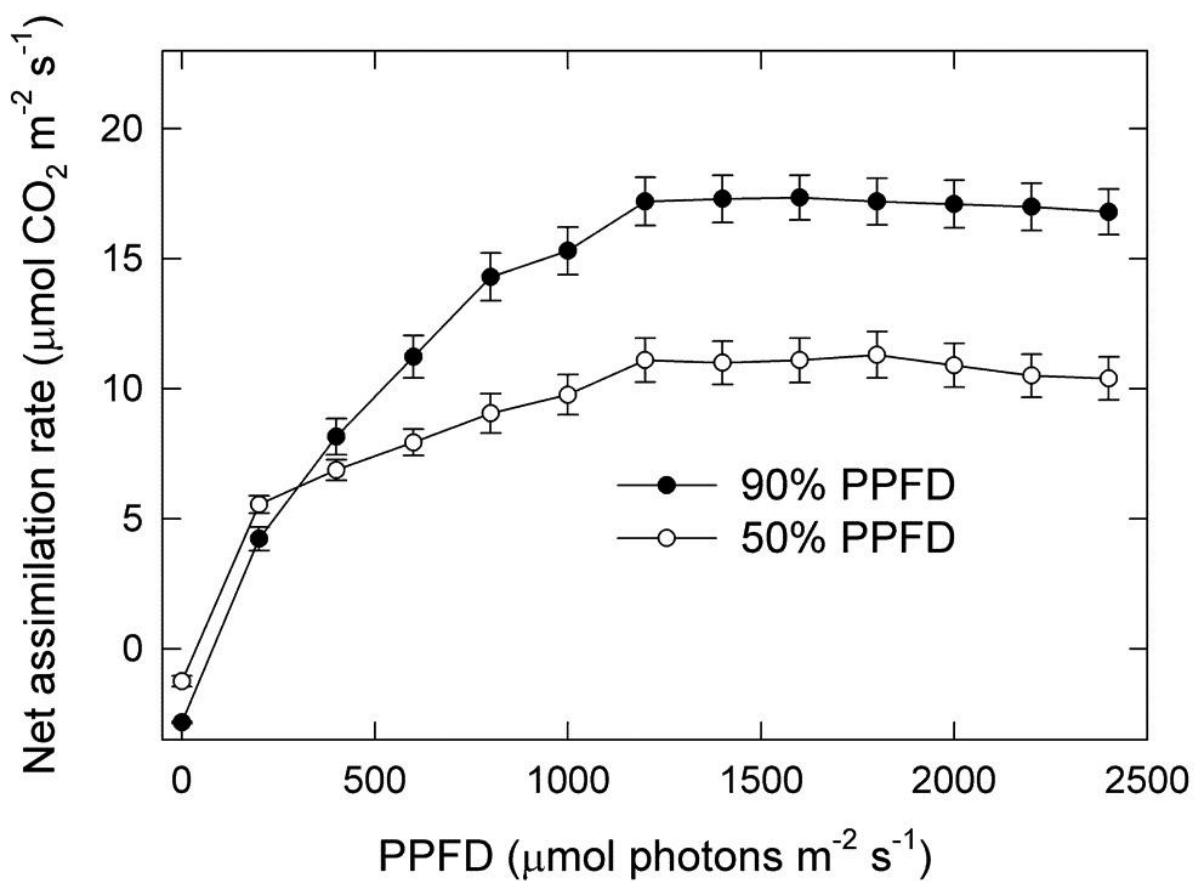

FIG. S2. Number of days of indicated average midday leaf water potential ( $\psi_L$ ) during the length of field experimental conditions for watered and non-watered individuals of *Ruellia nudiflora*, as indicated. Midday leaf water potential for desiccating plants was extrapolated for watered and non-watered individuals of *R. nudiflora* under field experimental conditions (196 days). After watering or a precipitation event of at least 7 mm (J.C. Cervera, UADY, Mérida, México, unpubl. res.),  $\psi_L$  returned to  $-0.4$  MPa and started decreasing following desiccation. Climatic data for the study area was obtained from Comisión Nacional del Agua.

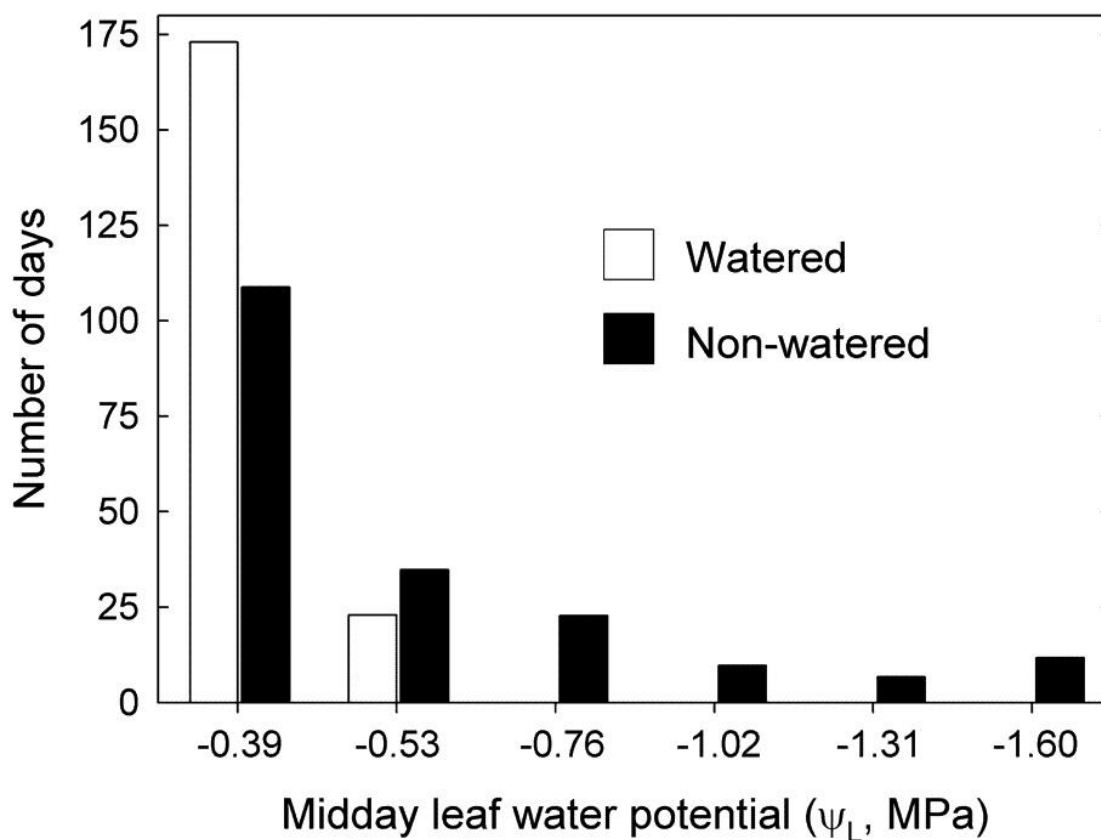

Supplement: supp_mcr284_mcr284supp.pdf [file supp_mcr284_mcr284supp.pdf]
